# Supplementary material
Source: PubMed Central journal article supplement (PMC5111770)
Supplement: HEC-25-1056-s001.pdf [file HEC-25-1056-s001.pdf]

# Efficiency of Health Investment: Education or Intelligence?

## *Appendix*

### A Transition probabilities

From (2) and (3) we can derive the analytical solution of the transition probabilities:

$$\begin{aligned}
 P_{HH}(s, t) &= \frac{1}{\theta_1 - \theta_2} \left[ (\lambda_{HI} + \lambda_{HD} + \theta_1) e^{\theta_2(t-s)} - (\lambda_{HI} + \lambda_{HD} + \theta_2) e^{\theta_1(t-s)} \right] \\
 P_{II}(s, t) &= \frac{1}{\theta_1 - \theta_2} \left[ (\lambda_{HI} + \lambda_{HD} + \theta_1) e^{\theta_1(t-s)} - (\lambda_{HI} + \lambda_{HD} + \theta_2) e^{\theta_2(t-s)} \right] \\
 P_{HI}(s, t) &= \frac{\lambda_{HI}}{\theta_1 - \theta_2} \left[ e^{\theta_1(t-s)} - e^{\theta_2(t-s)} \right] \\
 P_{IH}(s, t) &= \frac{\lambda_{IH}}{\theta_1 - \theta_2} \left[ e^{\theta_1(t-s)} - e^{\theta_2(t-s)} \right]
 \end{aligned}$$

with two non-zero eigenvalues

$$\begin{aligned}
 \theta_1 &= -\frac{1}{2}(\lambda_{HI} + \lambda_{IH} + \lambda_{HD} + \lambda_{ID}) + \frac{1}{2}\sqrt{(\lambda_{HI} + \lambda_{HD} - \lambda_{IH} - \lambda_{ID})^2 + 4\lambda_{HI}\lambda_{IH}} \\
 \theta_2 &= -\frac{1}{2}(\lambda_{HI} + \lambda_{IH} + \lambda_{HD} + \lambda_{ID}) - \frac{1}{2}\sqrt{(\lambda_{HI} + \lambda_{HD} - \lambda_{IH} - \lambda_{ID})^2 + 4\lambda_{HI}\lambda_{IH}}
 \end{aligned}$$

and

$$\theta_1 - \theta_2 = \sqrt{(\lambda_{HI} + \lambda_{HD} - \lambda_{IH} - \lambda_{ID})^2 + 4\lambda_{HI}\lambda_{IH}}$$

The probability to die at age  $t$ , the transition to death, is  $1 - P_{HH}(s, t) - P_{HI}(s, t)$  for an individual who is healthy at  $s$  and  $1 - P_{IH}(s, t) - P_{II}(s, t)$  for an individual ill at  $s$ .

Kalbfleisch et al. (1983) derive the derivatives of  $P(t)$  (provided that  $\theta_1 \neq \theta_2 \neq 0$ ). For  $k \in \{HI, HD, IH, ID\}$  we have

$$\frac{\partial P(s, t)}{\partial \lambda_k} = VG_k V^{-1} \tag{A.1}$$

where  $G_k(t)$  is and 3 x 3 matrix with  $(i, j)$ th element is  $M_{ij}^{(k)}$  times  $A_{ij}(s, t)$  with

$$A(s, t) = \begin{pmatrix} (t-s)e^{\theta_1(t-s)} & \frac{e^{\theta_1(t-s)} - e^{\theta_2(t-s)}}{\theta_1 - \theta_2} & 0 \\ \frac{e^{\theta_1(t-s)} - e^{\theta_2(t-s)}}{\theta_1 - \theta_2} & (t-s)e^{\theta_2(t-s)} & 0 \\ 0 & 0 & 0 \end{pmatrix}$$

and  $M_{ij}^{(k)}$  is the  $(i, j)$ th element of  $V^{-1}(\partial M / \partial \lambda_k)V$ . The  $\partial M / \partial \lambda_k$  matrices are very simple. e.g.

$$\frac{\partial M}{\partial \lambda_{ID}} = \begin{pmatrix} 0 & 0 & 0 \\ 0 & -1 & 1 \\ 0 & 0 & 0 \end{pmatrix}$$

## B Likelihood

The likelihood contribution of the first spell (either healthy to hospitalized or healthy to death) for individual  $i$ , who is only observed (left-truncated) after  $t_{i0}$ , is given by

$$\begin{aligned} L_{i1} &= \int \left[ \Phi(\gamma X_i^E + \alpha_E \theta) \cdot \lambda_{HI}^{(1)}(t_i | X^H, \theta)^{\Delta_{HIi}} \lambda_{HD}^{(1)}(t_i | X^H, \theta)^{\Delta_{HDi}} \cdot \right. \\ &\quad \left. S_H^{(1)}(t_i | X, \theta) / S_H^{(1)}(t_{i0} | X, \theta) \right]^{E_i} \\ &\quad \times \left[ \Phi(-\gamma X_i^E - \alpha_E \theta) \cdot \lambda_{HI}^{(0)}(t_i | X^H, \theta)^{\Delta_{HIi}} \lambda_{HD}^{(0)}(t_i | X^H, \theta)^{\Delta_{HDi}} \cdot \right. \\ &\quad \left. S_H^{(0)}(t_i | X, \theta) / S_H^{(0)}(t_{i0} | X, \theta) \right]^{1-E_i} \frac{1}{\sigma_M} \phi\left(\frac{M_i - \delta_1 X_i^M - \alpha_M \theta}{\sigma_M}\right) dH(\theta | T > t_{i0}) \end{aligned}$$

with  $\Delta_{HIi} = 1$  if individual  $i$  enters hospital before dying and  $\Delta_{HDi} = 1$  if individual  $i$  dies before entering hospital. The ‘total’ survival of individual  $i$ , the probability that he survives and stays out of hospital up till age  $t_i$  is

$$S_H^{(k)}(t | X, \theta) = \exp\left(-\int_0^t \lambda_{HI}^{(k)}(s | X^H, \theta) + \lambda_{HD}^{(k)}(s | X^H, \theta) ds\right) \quad k = 0, 1$$

The distribution of the latent skills conditional on survival up to  $t_{i0}$  is

$$\begin{aligned} dH(\theta | T > t_{i0}) &= \\ &= \frac{\Phi(\gamma X_i^E + \alpha_E \theta) S_H^{(1)}(t_{i0} | X, \theta) + \Phi(-\gamma X_i^E - \alpha_E \theta) S_H^{(0)}(t_{i0} | X, \theta) h(\theta)}{\int \Phi(\gamma X_i^E + \alpha_E \theta) S_H^{(1)}(t_{i0} | X, \theta) + \Phi(-\gamma X_i^E - \alpha_E \theta) S_H^{(0)}(t_{i0} | X, \theta) h(\theta) d\theta} \end{aligned}$$

The second spell in the multistate model (only for those who have not died) is either from hospitalized back to healthy or from hospitalized to death. Let  $\tau_{i1} = t_{2i} - t_{1i}$ ,

the time since entry to the hospital. Then, the likelihood contribution of the second spell is

$$L_{i2} = \frac{\int f_2(\tau_{i1}|t_{i1}, X, \theta) \left[ \Phi(\gamma X_i^E + \alpha_E \theta) S_H^{(1)}(t_{i1}|X, \theta) + \Phi(-\gamma X_i^E - \alpha_E \theta) S_H^{(0)}(t_{i1}|X, \theta) \right] h(\theta) d\theta}{\int \left[ \Phi(\gamma X_i^E + \alpha_E \theta) S_H^{(1)}(t_{i1}|X, \theta) + \Phi(-\gamma X_i^E - \alpha_E \theta) S_H^{(0)}(t_{i1}|X, \theta) \right] h(\theta) d\theta}$$

with

$$f_{i2}(\tau_{i1}|t_{i1}, X, \theta) = \left[ \lambda_{IH}^{(1)}(\tau_{i1}|X^I, t_{i1}, \theta)^{\Delta_{IH}i} \lambda_{ID}^{(1)}(\tau_{i1}|X^I, t_{i1}, \theta)^{\Delta_{ID}i} S_I^{(1)}(t_{i2}|X, \theta) / S_I^{(1)}(t_{i1}|X, \theta) \right]^{E_i} \\ \times \left[ \lambda_{IH}^{(0)}(\tau_{i1}|X^I, t_{i1}, \theta)^{\Delta_{IH}i} \lambda_{ID}^{(0)}(\tau_{i1}|X^I, t_{i1}, \theta)^{\Delta_{ID}i} S_I^{(0)}(t_{i2}|X, \theta) / S_I^{(0)}(t_{i1}|X, \theta) \right]^{1-E_i}$$

with  $\Delta_{IH}i = 1$  if individual  $i$  leaves hospital before dying and  $\Delta_{ID}i = 1$  if individual  $i$  dies in hospital and for  $k = 0, 1$

$$S_I^{(k)}(t_{i2}|X, \theta) = S_H^{(k)}(t_{i1}|X, \theta) \exp\left(-\int_{t_{i1}}^{t_{i2}} \lambda_{IH}^{(k)}(s|X^I, \theta) + \lambda_{ID}^{(k)}(s|X^I, \theta) ds\right)$$

The (possible) third spell in the multistate model is either from healthy back to hospitalized or from healthy to death. Then, the likelihood contribution of the third spell is

$$L_{i3} = \frac{\int f_3(t_{i3}|\theta) \left[ \Phi(\gamma X_i^E + \alpha_E \theta) S^{(1)}(t_{i2}|X, \theta) + \Phi(-\gamma X_i^E - \alpha_E \theta) S^{(0)}(t_{i2}|X, \theta) \right] h(\theta) d\theta}{\int \left[ \Phi(\gamma X_i^E + \alpha_E \theta) S^{(1)}(t_{i2}|X, \theta) + \Phi(-\gamma X_i^E - \alpha_E \theta) S^{(0)}(t_{i2}|X, \theta) \right] h(\theta) d\theta}$$

with

$$f_3(t_{i3}|t_{i2}, X, \theta) = \left[ \lambda_{HI}^{(1)}(t_{i3}|X, \theta)^{\Delta_{HI}i} \lambda_{HD}^{(1)}(t_{i3}|X, \theta)^{\Delta_{HD}i} S^{(1)}(t_{i3}|X, \theta) / S^{(1)}(t_{i2}|X, \theta) \right]^{E_i} \\ \times \left[ \lambda_{HI}^{(0)}(t_{i3}|X, \theta)^{\Delta_{HI}i} \lambda_{HD}^{(0)}(t_{i3}|X, \theta)^{\Delta_{HD}i} S^{(0)}(t_{i3}|X, \theta) / S^{(0)}(t_{i2}|X, \theta) \right]^{1-E_i}$$

$\Delta_{HI}i = 1$  if individual  $i$  enters (for the second time) hospital before dying and  $\Delta_{HD}i = 1$  if individual  $i$  dies before entering hospital (for the second time) and for  $k = 0, 1$

$$S^{(k)}(t_{i3}|X, \theta) = S_I^{(k)}(t_{i2}|X, \theta) \frac{S_{HI}^{(k)}(t_{i3}|X, \theta) S_{HD}^{(k)}(t_{i3}|X, \theta)}{S_{HI}^{(k)}(t_{i2}|X, \theta) S_{HD}^{(k)}(t_{i2}|X, \theta)}$$

The likelihood contributions for fourth and later spells are similar. The full likelihood (of individual  $i$ ) is the product of all these terms,  $L_{i1}, L_{i2}, L_{i3}$ , etc.

## C Additional Tables

Table C.1: Transition probabilities within one year by education

|     | $P_{ID}(t)$                                   |                  | $P_{IH}(t)$      |                  | $P_{HD}(t)$      |                  | $P_{HH}(t)$      |                  |
|-----|-----------------------------------------------|------------------|------------------|------------------|------------------|------------------|------------------|------------------|
|     | (0) <sup>a</sup>                              | (1) <sup>b</sup> | (0) <sup>a</sup> | (1) <sup>b</sup> | (0) <sup>a</sup> | (1) <sup>b</sup> | (0) <sup>a</sup> | (1) <sup>b</sup> |
| age | <i>model without covariates</i>               |                  |                  |                  |                  |                  |                  |                  |
| 55  | 3.9%                                          | 2.7%*            | 95.8%            | 97.1%*           | 0.7%             | 0.4%*            | 99.0%            | 99.4%*           |
| 60  | 4.2%                                          | 2.8%*            | 95.5%            | 97.0%*           | 1.0%             | 0.6%*            | 98.7%            | 99.2%*           |
| 65  | 4.7%                                          | 3.2%*            | 95.0%            | 96.6%*           | 1.5%             | 1.0%*            | 98.2%            | 98.8%*           |
| 70  | 5.6%                                          | 3.7%*            | 94.1%            | 96.1%*           | 2.5%             | 1.6%*            | 97.2%            | 98.2%*           |
| 75  | 7.3%                                          | 4.7%*            | 92.4%            | 95.1%*           | 4.3%             | 2.6%*            | 95.4%            | 97.2%*           |
| age | <i>Stratified model, reference individual</i> |                  |                  |                  |                  |                  |                  |                  |
| 55  | 0.3%                                          | 0.2%             | 99.6%            | 99.7%            | 0.2%             | 0.1%             | 99.8%            | 99.8%            |
| 60  | 0.5%                                          | 0.3%             | 99.5%            | 99.7%            | 0.3%             | 0.2%             | 99.6%            | 99.8%            |
| 65  | 0.7%                                          | 0.4%             | 99.2%            | 99.6%            | 0.5%             | 0.3%             | 99.4%            | 99.7%            |
| 70  | 1.1%                                          | 0.5%*            | 98.8%            | 99.4%*           | 1.0%             | 0.4%*            | 98.9%            | 99.5%*           |
| 75  | 2.0%                                          | 0.7%*            | 97.9%            | 99.2%*           | 1.9%             | 0.6%*            | 98.1%            | 99.3%*           |
| age | <i>Structural model, reference individual</i> |                  |                  |                  |                  |                  |                  |                  |
| 55  | 0.2%                                          | 0.2%             | 99.7%            | 99.8%            | 0.0%             | 0.0%             | 99.9%            | 99.9%            |
| 60  | 0.3%                                          | 0.2%             | 99.6%            | 99.7%            | 0.2%             | 0.1%             | 99.8%            | 99.8%            |
| 65  | 0.5%                                          | 0.4%             | 99.5%            | 99.6%            | 0.3%             | 0.2%             | 99.6%            | 99.7%            |
| 70  | 0.9%                                          | 0.6%             | 99.1%            | 99.4%            | 0.8%             | 0.5%             | 99.2%            | 99.5%            |
| 75  | 1.8%                                          | 1.0%             | 98.2%            | 98.9%            | 1.7%             | 0.9%             | 98.3%            | 99.0%            |

<sup>a</sup> Transition probability for  $E = 0$ , primary education.

<sup>b</sup> Transition probability for  $E = 1$ , above primary education.

\* $p < 0.05$  of difference.

Table C.2: Parameter estimates structural model by education level, transition rates from hospitalized

|                                             | Primary education             |                               | Above primary       |                               |
|---------------------------------------------|-------------------------------|-------------------------------|---------------------|-------------------------------|
|                                             | to healthy                    | to death                      | to healthy          | to death                      |
| Intelligence                                | 0.092 <sup>+</sup><br>(0.044) | 0.238<br>(0.183)              | 0.116**<br>(0.038)  | 0.129<br>(0.138)              |
| Male                                        | -0.062<br>(0.116)             | 0.062<br>(0.594)              | 0.056<br>(0.051)    | 0.095<br>(0.336)              |
| Child is working - base is "No"             |                               |                               |                     |                               |
| Yes                                         | -0.494**<br>(0.121)           | 0.246<br>(0.657)              | 0.084<br>(0.057)    | -0.669<br>(0.459)             |
| Missing                                     | -0.068<br>(0.229)             | -0.320<br>(1.179)             | 0.045<br>(0.087)    | -0.999<br>(0.669)             |
| Birthrank - base is "First"                 |                               |                               |                     |                               |
| Second                                      | -0.066<br>(0.205)             | -                             | -0.100<br>(0.074)   | 0.829<br>(0.458)              |
| Third or Fourth                             | -0.096<br>(0.185)             | -                             | -0.176**<br>(0.069) | -0.030<br>(0.493)             |
| Fifth or higher                             | -0.045<br>(0.187)             | -                             | -0.187**<br>(0.067) | 0.214<br>(0.462)              |
| Missing                                     | -0.288<br>(0.279)             | -                             | -0.330**<br>(0.123) | 0.593<br>(0.847)              |
| Health status in 1993 - base is "good"      |                               |                               |                     |                               |
| Poor health                                 | -0.153<br>(0.135)             | 0.079<br>(0.669)              | -0.196**<br>(0.066) | -0.270<br>(0.440)             |
| Previous hospitalization and last diagnosis |                               |                               |                     |                               |
| Repeated admittance                         | 0.127<br>(0.124)              | 1.562<br>(0.845)              | 0.073<br>(0.055)    | 0.736<br>(0.389)              |
| Neoplasm                                    | -0.297<br>(0.188)             | 1.534 <sup>+</sup><br>(0.670) | -0.263**<br>(0.071) | 2.740**<br>(0.504)            |
| Circulatory                                 | 0.047<br>(0.139)              | 0.436<br>(0.793)              | -0.074<br>(0.061)   | 0.648<br>(0.581)              |
| Respiratory                                 | -0.309<br>(0.203)             | -                             | 0.178<br>(0.120)    | 1.572 <sup>+</sup><br>(0.738) |
| Digestive                                   | 0.030<br>(0.171)              | -                             | 0.247**<br>(0.080)  | 1.288<br>(0.676)              |
| Acute                                       | -0.406**<br>(0.107)           | 1.352<br>(0.779)              | -0.340**<br>(0.049) | 1.458**<br>(0.368)            |
| (log) constant                              | -1.576<br>(0.228)             | -7.983<br>(1.157)             | -1.837<br>(0.074)   | -8.626<br>(0.715)             |

<sup>b</sup> Duration time from hospitalized is days since hospital admission.

<sup>+</sup> $p < 0.05$  and  $**p < 0.01$

Table C.2: Parameter estimates structural model by education level, transition rates *from healthy*

|                                             | Primary education              |                                | Above primary       |                                |
|---------------------------------------------|--------------------------------|--------------------------------|---------------------|--------------------------------|
|                                             | to hospitalized                | to death                       | to hospitalized     | to death                       |
| Intelligence                                | -0.537**<br>(0.159)            | -0.142<br>(0.137)              | -0.561**<br>(0.161) | -0.649**<br>(0.196)            |
| Male                                        | -0.256<br>(0.147)              | 0.750**<br>(0.301)             | 0.238**<br>(0.067)  | 0.717**<br>(0.137)             |
| Child is working - base is "No"             |                                |                                |                     |                                |
| Yes                                         | 0.315<br>(0.164)               | 0.160<br>(0.282)               | 0.076<br>(0.073)    | 0.756**<br>(0.151)             |
| Missing                                     | 0.072<br>(0.319)               | -2.005 <sup>+</sup><br>(0.789) | 0.003<br>(0.114)    | 0.261<br>(0.160)               |
| Family Socioeconomic Status - base is "Low" |                                |                                |                     |                                |
| Middle                                      | -0.029<br>(0.184)              | -0.035<br>(0.339)              | -0.224**<br>(0.065) | -0.012<br>(0.142)              |
| High                                        | -0.029<br>(0.184)              | -0.035<br>(0.339)              | 0.198<br>(0.195)    | 0.487<br>(0.371)               |
| Missing                                     | -0.698 <sup>+</sup><br>(0.328) | -0.462<br>(0.661)              | 0.010<br>(0.153)    | 0.535<br>(0.334)               |
| Birthrank - base is "First"                 |                                |                                |                     |                                |
| Second                                      | 0.758 <sup>+</sup><br>(0.302)  | -0.355<br>(0.440)              | 0.107<br>(0.096)    | -0.011<br>(0.192)              |
| Third or Fourth                             | 1.034**<br>(0.286)             | -0.117<br>(0.413)              | 0.105<br>(0.085)    | -0.157<br>(0.183)              |
| Fifth or higher                             | 0.659 <sup>+</sup><br>(0.265)  | 0.073<br>(0.383)               | 0.113<br>(0.086)    | -0.343<br>(0.189)              |
| Missing                                     | 1.368**<br>(0.437)             | 1.375 <sup>+</sup><br>(0.651)  | -0.103<br>(0.166)   | -0.835 <sup>+</sup><br>(0.396) |
| Health status in 1993 - base is "good"      |                                |                                |                     |                                |
| Poor health                                 | 0.739**<br>(0.221)             | -0.352<br>(0.535)              | 0.463**<br>(0.089)  | 0.350<br>(0.204)               |
| Missing                                     | -0.158<br>(0.174)              | 0.590<br>(0.318)               | 0.077<br>(0.069)    | 0.160<br>(0.150)               |
| Hospitalization and last diagnosis          |                                |                                |                     |                                |
| Has been in hospital                        | 0.397 <sup>+</sup><br>(0.203)  | 0.364<br>(0.369)               | 0.849**<br>(0.071)  | 0.278<br>(0.171)               |
| Neoplasm                                    | 1.151**<br>(0.254)             | 1.871**<br>(0.553)             | 1.184**<br>(0.100)  | 2.073**<br>(0.188)             |
| Circulatory                                 | 0.555**<br>(0.185)             | 0.104<br>(0.438)               | 0.636**<br>(0.083)  | 0.732**<br>(0.198)             |
| Respiratory                                 | 0.248<br>(0.272)               | 1.663**<br>(0.545)             | 0.254<br>(0.181)    | 0.204<br>(0.449)               |
| Digestive                                   | 0.394<br>(0.245)               | 0.168<br>(0.560)               | -0.053<br>(0.124)   | -0.102<br>(0.288)              |
| (log) constant                              | -3.779<br>(0.366)              | -15.990<br>(2.164)             | -3.396<br>(0.088)   | -14.901<br>(1.069)             |
| Age                                         | -                              | 0.159<br>(0.031)               | -                   | 0.137<br>(0.016)               |

<sup>a</sup> Duration time from healthy is years since birth.

<sup>+</sup>  $p < 0.05$  and \*\*  $p < 0.01$

Table C.2: Parameter estimates structural model by education level (continued)

|                                             | Education <sup>c</sup>         | Raven test <sup>d</sup> |
|---------------------------------------------|--------------------------------|-------------------------|
| Intelligence                                | 0.137 <sup>+</sup><br>(0.063)  | 1                       |
| Male                                        | -0.252**<br>(0.083)            | -0.887<br>(0.528)       |
| Child is working - base is "No"             |                                |                         |
| Yes                                         | -0.207 <sup>+</sup><br>(0.091) | -3.767**<br>(0.627)     |
| Missing                                     | -0.281 <sup>+</sup><br>(0.137) | -1.103<br>(0.899)       |
| Family Socioeconomic Status - base is "Low" |                                |                         |
| Middle                                      | 0.361**<br>(0.094)             | 2.570**<br>(0.543)      |
| High                                        | 0.396<br>(0.453)               | 4.242**<br>(1.636)      |
| Missing                                     | -0.511**<br>(0.175)            | -4.342**<br>(1.294)     |
| Birthrank - base is "First"                 |                                |                         |
| Second                                      | -0.137<br>(0.122)              | 0.468<br>(0.785)        |
| Third or Fourth                             | -0.074<br>(0.113)              | -0.263<br>(0.733)       |
| Fifth or higher                             | -0.057<br>(0.111)              | -3.053**<br>(0.729)     |
| Missing                                     | 0.104<br>(0.304)               | -0.654<br>(1.469)       |
| School religion - base is "Catholic"        |                                |                         |
| Protestant                                  | 0.311**<br>(0.106)             | 0.626<br>(0.682)        |
| Other                                       | 0.388 <sup>+</sup><br>(0.195)  | 5.051**<br>(1.124)      |
| Number of teachers - base is "5-8 teachers" |                                |                         |
| ≤ 4                                         | -0.147<br>(0.100)              | -3.837**<br>(0.725)     |
| 9-12                                        | 0.058<br>(0.096)               | 0.410<br>(0.631)        |
| Missing                                     | 0.314<br>(0.215)               | 0.843<br>(1.298)        |
| Constant                                    | 2.109<br>(0.206)               | 3.621<br>(0.741)        |

<sup>c</sup> Education choice probit model.

<sup>d</sup> IQ-measurement linear model, centered around IQ = 100.

<sup>+</sup>  $p < 0.05$  and **\*\***  $p < 0.01$

Table C.2: Parameter estimates structural model by education level (continued)

|                                                                 | Education <sup>c</sup> | Raven test <sup>d</sup> | $\theta$ |
|-----------------------------------------------------------------|------------------------|-------------------------|----------|
| Teacher's advice - base is "Lower vocational school"            |                        |                         |          |
| Continued primary school                                        | -0.264**               |                         |          |
|                                                                 | (0.090)                |                         |          |
| Lower general secondary school                                  | 0.459**                |                         |          |
|                                                                 | (0.165)                |                         |          |
| Higher general secondary school                                 | 0.538 <sup>+</sup>     |                         |          |
|                                                                 | (0.255)                |                         |          |
| Missing                                                         | -0.543 <sup>+</sup>    |                         |          |
|                                                                 | (0.250)                |                         |          |
| Repeat grade - base is "None"                                   |                        |                         |          |
| Once                                                            | -0.295**               |                         |          |
|                                                                 | (0.087)                |                         |          |
| Twice                                                           | -0.709**               |                         |          |
|                                                                 | (0.118)                |                         |          |
| Missing                                                         | 0.751                  |                         |          |
|                                                                 | (0.411)                |                         |          |
| Preference of the parents - base is "Only vocational education" |                        |                         |          |
| Work in own company                                             | -0.885**               |                         |          |
|                                                                 | (0.190)                |                         |          |
| Work without education                                          | -1.357**               |                         |          |
|                                                                 | (0.185)                |                         |          |
| Work with education                                             | -0.921**               |                         |          |
|                                                                 | (0.198)                |                         |          |
| General secondary school                                        | -0.345                 |                         |          |
|                                                                 | (0.179)                |                         |          |
| Missing                                                         | -0.923**               |                         |          |
|                                                                 | (0.184)                |                         |          |
| Distribution of $\theta$                                        |                        |                         |          |
| $\theta_1$                                                      |                        |                         | -5.310   |
|                                                                 |                        |                         | (1.525)  |
| $\theta_2$                                                      |                        |                         | 0.426    |
|                                                                 |                        |                         | (0.129)  |
| $\theta_3$                                                      |                        |                         | -2.628   |
|                                                                 |                        |                         | (0.758)  |
| $p_1$                                                           |                        |                         | 0.012    |
|                                                                 |                        |                         | (0.003)  |
| $p_2$                                                           |                        |                         | 0.871    |
|                                                                 |                        |                         | (0.002)  |
| $p_3$                                                           |                        |                         | 0.118    |
|                                                                 |                        |                         | (0.015)  |

<sup>c</sup> Education choice probit model.

<sup>d</sup> IQ-measurement linear model.

<sup>+</sup> $p < 0.05$  and <sup>\*\*</sup> $p < 0.01$



Table C.3: Transition probability within one year by education and diagnosis, stratified model

|     | $P_{ID}(t)$                            |                  | $P_{IH}(t)$      |                  | $P_{HD}(t)$      |                  | $P_{HH}(t)$      |                  |
|-----|----------------------------------------|------------------|------------------|------------------|------------------|------------------|------------------|------------------|
|     | (0) <sup>a</sup>                       | (1) <sup>b</sup> | (0) <sup>a</sup> | (1) <sup>b</sup> | (0) <sup>a</sup> | (1) <sup>b</sup> | (0) <sup>a</sup> | (1) <sup>b</sup> |
| age | diagnosis: <i>neoplasm</i>             |                  |                  |                  |                  |                  |                  |                  |
| 55  | 5.3%                                   | 7.1%             | 94.0%            | 91.9%            | 2.4%             | 3.2%             | 96.8%            | 95.7%            |
| 60  | 6.4%                                   | 7.8%             | 92.8%            | 91.2%            | 3.7%             | 4.0%             | 95.6%            | 95.0%            |
| 65  | 8.5%                                   | 8.9%             | 90.8%            | 90.0%            | 5.9%             | 5.2%             | 93.4%            | 93.7%            |
| 70  | 12.3%                                  | 10.7%            | 87.0%            | 88.3%            | 9.8%             | 7.0%             | 89.4%            | 91.9%            |
| 75  | 18.9%                                  | 13.3%            | 80.4%            | 85.7%            | 16.8%            | 9.8%*            | 82.5%            | 89.1%            |
| age | diagnosis: <i>circulatory diseases</i> |                  |                  |                  |                  |                  |                  |                  |
| 55  | 1.4%                                   | 0.9%             | 98.2%            | 98.6%            | 0.5%             | 0.5%             | 99.1%            | 99.1%            |
| 60  | 1.7%                                   | 1.1%             | 98.0%            | 98.4%            | 0.7%             | 0.7%             | 98.9%            | 98.8%            |
| 65  | 2.1%                                   | 1.4%             | 97.5%            | 98.1%            | 1.1%             | 1.0%             | 98.5%            | 98.5%            |
| 70  | 2.8%                                   | 1.9%             | 96.8%            | 97.6%            | 1.9%             | 1.5%             | 97.7%            | 98.0%            |
| 75  | 4.3%                                   | 2.7%             | 95.4%            | 96.9%            | 3.4%             | 2.3%             | 96.2%            | 97.2%            |
| age | diagnosis: <i>respiratory diseases</i> |                  |                  |                  |                  |                  |                  |                  |
| 55  | 2.7%                                   | 1.4%             | 96.2%            | 98.2%            | 2.0%             | 0.5%             | 96.9%            | 99.1%            |
| 60  | 4.0%                                   | 1.5%             | 94.9%            | 98.1%            | 3.3%             | 0.7%             | 95.6%            | 98.9%            |
| 65  | 6.4%                                   | 1.8%*            | 92.5%            | 97.8%*           | 5.8%             | 1.0%*            | 93.1%            | 98.6%*           |
| 70  | 10.7%                                  | 2.2%*            | 88.2%            | 97.4%*           | 10.3%            | 1.4%*            | 88.7%            | 98.2%*           |
| 75  | 18.2%                                  | 2.9%*            | 80.8%            | 96.7%*           | 18.0%            | 2.1%*            | 81.0%            | 97.5%*           |
| age | diagnosis: <i>digestive diseases</i>   |                  |                  |                  |                  |                  |                  |                  |
| 55  | 0.9%                                   | 0.9%             | 98.9%            | 98.9%            | 0.4%             | 0.3%             | 99.3%            | 99.5%            |
| 60  | 1.1%                                   | 1.0%             | 98.6%            | 98.8%            | 0.6%             | 0.4%             | 99.1%            | 99.4%            |
| 65  | 1.5%                                   | 1.2%             | 98.2%            | 98.6%            | 1.1%             | 0.7%             | 98.6%            | 99.2%            |
| 70  | 2.3%                                   | 1.5%             | 97.4%            | 98.3%            | 1.9%             | 1.0%             | 97.8%            | 98.9%            |
| 75  | 3.8%                                   | 2.0%             | 95.9%            | 97.8%            | 3.4%             | 1.4%*            | 96.3%            | 98.4%            |

<sup>a</sup> Transition probability for  $E = 0$ , primary education.

<sup>b</sup> Transition probability for  $E = 1$ , above primary education.

Based on structural model \* $p < 0.05$  of difference.

Table C.4: Transition probability within one year by education and diagnosis, structural model

|     | $P_{ID}(t)$                            |                  | $P_{IH}(t)$      |                  | $P_{HD}(t)$      |                  | $P_{HH}(t)$      |                  |
|-----|----------------------------------------|------------------|------------------|------------------|------------------|------------------|------------------|------------------|
|     | (0) <sup>a</sup>                       | (1) <sup>b</sup> | (0) <sup>a</sup> | (1) <sup>b</sup> | (0) <sup>a</sup> | (1) <sup>b</sup> | (0) <sup>a</sup> | (1) <sup>b</sup> |
| age | diagnosis: <i>neoplasm</i>             |                  |                  |                  |                  |                  |                  |                  |
| 55  | 5.2%                                   | 5.8%             | 94.7%            | 93.7%            | 1.1%             | 1.7%             | 98.8%            | 97.8%            |
| 60  | 5.9%                                   | 6.4%             | 93.9%            | 93.1%            | 1.9%             | 2.3%             | 98.0%            | 97.2%            |
| 65  | 7.5%                                   | 7.5%             | 92.3%            | 92.0%            | 3.6%             | 3.5%             | 96.3%            | 96.0%            |
| 70  | 11.0%                                  | 9.8%             | 88.9%            | 89.8%            | 7.3%             | 5.6%             | 92.6%            | 93.6%            |
| 75  | 18.2%                                  | 14.0%            | 81.6%            | 85.6%            | 14.9%            | 10.4%            | 85.0%            | 89.1%            |
| age | diagnosis: <i>circulatory diseases</i> |                  |                  |                  |                  |                  |                  |                  |
| 55  | 1.1%                                   | 0.7%             | 98.8%            | 99.1%            | 0.2%             | 0.2%             | 99.8%            | 99.5%            |
| 60  | 1.3%                                   | 0.8%             | 98.6%            | 98.9%            | 0.3%             | 0.4%             | 99.6%            | 99.3%            |
| 65  | 1.6%                                   | 1.1%             | 98.3%            | 98.6%            | 0.6%             | 0.7%             | 99.3%            | 99.0%            |
| 70  | 2.2%                                   | 1.8%             | 97.7%            | 98.0%            | 1.3%             | 1.4%             | 98.7%            | 98.4%            |
| 75  | 3.7%                                   | 3.0%             | 96.3%            | 96.7%            | 2.8%             | 2.6%             | 97.2%            | 97.1%            |
| age | diagnosis: <i>respiratory diseases</i> |                  |                  |                  |                  |                  |                  |                  |
| 55  | 1.5%                                   | 1.1%             | 98.4%            | 98.8%            | 0.6%             | 0.2%             | 99.4%            | 99.7%            |
| 60  | 2.2%                                   | 1.2%             | 97.8%            | 98.7%            | 1.2%             | 0.3%             | 98.7%            | 99.6%            |
| 65  | 3.5%                                   | 1.3%*            | 96.5%            | 98.5%*           | 2.6%             | 0.5%*            | 97.3%            | 99.4%*           |
| 70  | 6.4%                                   | 1.7%*            | 93.5%            | 98.2%*           | 5.6%             | 0.9%*            | 94.3%            | 99.0%*           |
| 75  | 12.7%                                  | 2.5%*            | 87.3%            | 97.4%*           | 12.0%            | 1.6%*            | 87.9%            | 98.3%*           |
| age | diagnosis: <i>digestive diseases</i>   |                  |                  |                  |                  |                  |                  |                  |
| 55  | 0.8%                                   | 0.7%             | 99.1%            | 99.2%            | 0.2%             | 0.1%             | 99.8%            | 99.8%            |
| 60  | 1.0%                                   | 0.8%             | 99.0%            | 99.1%            | 0.3%             | 0.2%             | 99.6%            | 99.7%            |
| 65  | 1.3%                                   | 0.9%             | 98.7%            | 99.0%            | 0.6%             | 0.3%             | 99.3%            | 99.6%            |
| 70  | 2.0%                                   | 1.2%             | 98.0%            | 98.7%            | 1.3%             | 0.6%             | 98.6%            | 99.3%            |
| 75  | 3.5%                                   | 1.8%*            | 96.5%            | 98.1%            | 2.9%             | 1.2%*            | 97.1%            | 98.7%            |

<sup>a</sup> Transition probability for  $E = 0$ , primary education.

<sup>b</sup> Transition probability for  $E = 1$ , above primary education.

Based on structural model \* $p < 0.05$  of difference.

Table C.5: Transition probability within one year by education and diagnosis, females

|     | $P_{ID}(t)$                                             |                  | $P_{IH}(t)$      |                  | $P_{HD}(t)$      |                  | $P_{HH}(t)$      |                  |
|-----|---------------------------------------------------------|------------------|------------------|------------------|------------------|------------------|------------------|------------------|
|     | (0) <sup>a</sup>                                        | (1) <sup>b</sup> | (0) <sup>a</sup> | (1) <sup>b</sup> | (0) <sup>a</sup> | (1) <sup>b</sup> | (0) <sup>a</sup> | (1) <sup>b</sup> |
| age | Stratified model: reference individual                  |                  |                  |                  |                  |                  |                  |                  |
| 55  | 0.5%                                                    | 0.3%             | 99.4%            | 99.7%            | 0.3%             | 0.2%             | 99.6%            | 99.7%            |
| 60  | 0.7%                                                    | 0.5%             | 99.2%            | 99.5%            | 0.6%             | 0.3%             | 99.3%            | 99.6%            |
| 65  | 1.2%                                                    | 0.6%*            | 98.7%            | 99.3%            | 1.1%             | 0.5%*            | 98.8%            | 99.4%            |
| 70  | 2.2%                                                    | 0.9%*            | 97.8%            | 99.0%*           | 2.1%             | 0.8%*            | 97.9%            | 99.1%*           |
| 75  | 3.8%                                                    | 1.4%*            | 96.1%            | 98.6%*           | 3.8%             | 1.3%*            | 96.1%            | 98.7%*           |
| age | Structural model: reference individual                  |                  |                  |                  |                  |                  |                  |                  |
| 55  | 0.3%                                                    | 0.3%             | 99.6%            | 99.7%            | 0.2%             | 0.1%             | 99.8%            | 99.8%            |
| 60  | 0.5%                                                    | 0.4%             | 99.5%            | 99.6%            | 0.3%             | 0.3%             | 99.6%            | 99.7%            |
| 65  | 0.9%                                                    | 0.6%             | 99.1%            | 99.3%            | 0.7%             | 0.5%             | 99.2%            | 99.4%            |
| 70  | 1.8%                                                    | 1.1%             | 98.2%            | 98.8%            | 1.6%             | 1.0%             | 98.4%            | 98.9%            |
| 75  | 3.6%                                                    | 2.1%             | 96.3%            | 97.8%            | 3.5%             | 2.0%             | 96.5%            | 97.9%            |
| age | Structural model diagnosis: <i>neoplasm</i>             |                  |                  |                  |                  |                  |                  |                  |
| 55  | 6.3%                                                    | 6.9%             | 93.6%            | 92.5%            | 1.8%             | 2.7%             | 98.1%            | 96.7%            |
| 60  | 7.9%                                                    | 8.2%             | 92.0%            | 91.3%            | 3.3%             | 4.0%             | 96.5%            | 95.4%            |
| 65  | 11.2%                                                   | 10.5%            | 88.7%            | 88.9%            | 6.9%             | 6.6%             | 93.0%            | 92.9%            |
| 70  | 18.1%                                                   | 15.0%            | 81.8%            | 84.4%            | 14.3%            | 11.4%            | 85.6%            | 88.1%            |
| 75  | 31.5%                                                   | 23.3%            | 68.4%            | 76.2%            | 28.5%            | 20.2%            | 71.4%            | 79.4%            |
| age | Structural model diagnosis: <i>circulatory diseases</i> |                  |                  |                  |                  |                  |                  |                  |
| 55  | 1.4%                                                    | 0.9%             | 98.5%            | 98.8%            | 0.3%             | 0.4%             | 99.7%            | 99.3%            |
| 60  | 1.7%                                                    | 1.2%             | 98.2%            | 98.5%            | 0.6%             | 0.8%             | 99.4%            | 98.9%            |
| 65  | 2.3%                                                    | 1.9%             | 97.6%            | 97.8%            | 1.2%             | 1.5%             | 98.7%            | 98.2%            |
| 70  | 3.7%                                                    | 3.2%             | 96.3%            | 96.5%            | 2.6%             | 2.8%             | 97.4%            | 96.9%            |
| 75  | 6.6%                                                    | 5.8%             | 93.4%            | 93.9%            | 5.6%             | 5.5%             | 94.4%            | 94.2%            |
| age | Structural model diagnosis: <i>respiratory diseases</i> |                  |                  |                  |                  |                  |                  |                  |
| 55  | 2.2%                                                    | 1.2%             | 97.8%            | 98.6%            | 1.2%             | 0.3%             | 98.8%            | 99.5%            |
| 60  | 3.5%                                                    | 1.4%*            | 96.5%            | 98.4%            | 2.5%             | 0.5%*            | 97.4%            | 99.3%            |
| 65  | 6.3%                                                    | 1.8%*            | 93.6%            | 98.0%*           | 5.4%             | 0.9%*            | 94.5%            | 98.9%*           |
| 70  | 12.3%                                                   | 2.6%*            | 87.7%            | 97.2%*           | 11.5%            | 1.8%*            | 88.4%            | 98.1%*           |
| 75  | 24.1%                                                   | 4.2%*            | 75.8%            | 95.7%*           | 23.7%            | 3.3%*            | 76.3%            | 96.5%*           |
| age | Structural model diagnosis: <i>digestive diseases</i>   |                  |                  |                  |                  |                  |                  |                  |
| 55  | 1.0%                                                    | 0.9%             | 98.9%            | 99.0%            | 0.3%             | 0.2%             | 99.7%            | 99.7%            |
| 60  | 1.3%                                                    | 1.0%             | 98.6%            | 98.9%            | 0.6%             | 0.4%             | 99.4%            | 99.5%            |
| 65  | 2.0%                                                    | 1.3%             | 98.0%            | 98.6%            | 1.3%             | 0.7%             | 98.7%            | 99.2%            |
| 70  | 3.4%                                                    | 1.9%             | 96.5%            | 98.0%            | 2.7%             | 1.3%             | 97.2%            | 98.6%            |
| 75  | 6.5%                                                    | 3.0%*            | 93.4%            | 96.9%            | 5.9%             | 2.4%*            | 94.1%            | 97.5%*           |

<sup>a</sup> Transition probability for  $E = 0$ , primary education.

<sup>b</sup> Transition probability for  $E = 1$ , above primary education.

\*  $p < 0.05$  of difference.

Table C.6: Transition probability within one year by education and diagnosis, model with no endogenous variables (diagnoses)

|     | $P_{ID}(t)$                            |                  | $P_{IH}(t)$      |                  | $P_{HD}(t)$      |                  | $P_{HH}(t)$      |                  |
|-----|----------------------------------------|------------------|------------------|------------------|------------------|------------------|------------------|------------------|
|     | (0) <sup>a</sup>                       | (1) <sup>b</sup> | (0) <sup>a</sup> | (1) <sup>b</sup> | (0) <sup>a</sup> | (1) <sup>b</sup> | (0) <sup>a</sup> | (1) <sup>b</sup> |
|     | Stratified model: reference individual |                  |                  |                  |                  |                  |                  |                  |
| age |                                        |                  |                  |                  |                  |                  |                  |                  |
| 55  | 0.7%                                   | 0.3%             | 98.2%            | 99.5%            | 0.4%             | 0.2%             | 99.5%            | 99.7%            |
| 60  | 1.0%                                   | 0.5%             | 98.9%            | 99.4%            | 0.7%             | 0.3%             | 99.2%            | 99.5%            |
| 65  | 1.6%                                   | 0.7%*            | 98.3%            | 99.2%            | 1.3%             | 0.5%*            | 98.6%            | 99.3%            |
| 70  | 2.6%                                   | 1.1%*            | 97.3%            | 98.8%*           | 2.3%             | 0.9%*            | 97.6%            | 98.9%*           |
| 75  | 4.6%                                   | 1.8%*            | 95.3%            | 98.1%*           | 4.4%             | 1.7%*            | 95.5%            | 98.2%*           |
|     | Structural model: reference individual |                  |                  |                  |                  |                  |                  |                  |
| age |                                        |                  |                  |                  |                  |                  |                  |                  |
| 55  | 0.5%                                   | 1.3%*            | 99.5%            | 98.6%*           | 0.1%             | 0.1%             | 99.8%            | 99.8%            |
| 60  | 0.6%                                   | 1.4%*            | 99.3%            | 98.5%*           | 0.3%             | 0.2%             | 99.7%            | 99.7%            |
| 65  | 1.0%                                   | 1.6%*            | 99.0%            | 98.3%*           | 0.7%             | 0.4%             | 99.3%            | 99.5%            |
| 70  | 1.8%                                   | 2.0%             | 98.2%            | 98.0%            | 1.5%             | 0.8%*            | 98.5%            | 99.1%            |
| 75  | 3.5%                                   | 2.7%             | 96.5%            | 97.3%            | 3.2%             | 1.5%*            | 96.8%            | 98.4%*           |

<sup>a</sup> Transition probability for  $E = 0$ , primary education.

<sup>b</sup> Transition probability for  $E = 1$ , above primary education.

\*  $p < 0.05$  of difference.

Table C.7: Transition probability within one year by education and diagnosis, model with 3 education levels (stratified model)

|                                        | (0) <sup>a</sup> | (1) <sup>b</sup> | (2) <sup>c</sup> | (0) <sup>a</sup> | (1) <sup>b</sup> | (2) <sup>c</sup> |
|----------------------------------------|------------------|------------------|------------------|------------------|------------------|------------------|
| reference individual                   |                  |                  |                  |                  |                  |                  |
| age                                    |                  | $P_{ID}(t)$      |                  |                  | $P_{IH}(t)$      |                  |
| 55                                     | 0.3%             | 0.2%             | 0.2%             | 99.6%            | 99.7%            | 99.8%            |
| 60                                     | 0.5%             | 0.3%             | 0.2%             | 99.5%            | 99.7%            | 99.7%            |
| 65                                     | 0.7%             | 0.3%             | 0.3%             | 99.2%            | 99.6%            | 99.6%            |
| 70                                     | 1.1%             | 0.5%*            | 0.5%             | 98.8%            | 99.5%*           | 99.4%            |
| 75                                     | 2.0%             | 0.7%*            | 0.8%             | 97.9%            | 99.3%*           | 99.1%            |
| age                                    |                  | $P_{HD}(t)$      |                  |                  | $P_{HH}(t)$      |                  |
| 55                                     | 0.2%             | 0.1%             | 0.1%             | 99.8%            | 99.8%            | 99.8%            |
| 60                                     | 0.3%             | 0.2%             | 0.2%             | 99.6%            | 99.8%            | 99.8%            |
| 65                                     | 0.5%             | 0.2%             | 0.3%             | 99.4%            | 99.7%            | 99.7%            |
| 70                                     | 1.0%             | 0.4%*            | 0.5%             | 98.9%            | 99.6%*           | 99.5%            |
| 75                                     | 1.9%             | 0.6%*            | 0.8%             | 98.1%            | 99.4%*           | 99.2%            |
| diagnosis: <i>neoplasm</i>             |                  |                  |                  |                  |                  |                  |
| age                                    |                  | $P_{ID}(t)$      |                  |                  | $P_{IH}(t)$      |                  |
| 55                                     | 5.3%             | 5.7%             | 6.3%             | 94.0%            | 93.3%            | 92.4%            |
| 60                                     | 6.4%             | 6.6%             | 6.8%             | 92.8%            | 92.4%            | 91.9%            |
| 65                                     | 8.5%             | 7.8%             | 7.6%             | 90.8%            | 91.2%            | 91.1%            |
| 70                                     | 12.3%            | 9.8%             | 9.0%             | 87.0%            | 89.3%            | 89.8%            |
| 75                                     | 18.9%            | 12.6%            | 11.1%            | 80.4%            | 86.5%            | 87.6%            |
| age                                    |                  | $P_{HD}(t)$      |                  |                  | $P_{HH}(t)$      |                  |
| 55                                     | 2.4%             | 2.9%             | 2.5%             | 96.8%            | 96.1%            | 96.2%            |
| 60                                     | 3.7%             | 3.8%             | 3.0%             | 95.6%            | 95.2%            | 95.6%            |
| 65                                     | 5.9%             | 5.1%             | 3.9%             | 93.4%            | 93.8%            | 94.7%            |
| 70                                     | 9.8%             | 7.2%             | 5.4%             | 89.4%            | 91.8%            | 93.3%            |
| 75                                     | 16.7%            | 10.2%            | 7.7%             | 82.5%            | 88.9%            | 91.0%            |
| diagnosis: <i>circulatory diseases</i> |                  |                  |                  |                  |                  |                  |
| age                                    |                  | $P_{ID}(t)$      |                  |                  | $P_{IH}(t)$      |                  |
| 55                                     | 1.4%             | 0.8%             | 1.7%             | 98.2%            | 98.7%            | 98.0%            |
| 60                                     | 1.7%             | 1.0%             | 1.8%             | 98.0%            | 98.5%            | 98.0%            |
| 65                                     | 2.1%             | 1.4%             | 2.0%             | 97.5%            | 98.1%            | 97.8%            |
| 70                                     | 2.8%             | 1.9%             | 2.2%             | 96.8%            | 97.6%            | 97.6%            |
| 75                                     | 4.3%             | 2.7%             | 2.6%             | 95.4%            | 96.8%            | 97.2%            |
| age                                    |                  | $P_{HD}(t)$      |                  |                  | $P_{HH}(t)$      |                  |
| 55                                     | 0.5%             | 0.5%             | 0.3%             | 99.1%            | 99.0%            | 99.5%            |
| 60                                     | 0.7%             | 0.8%             | 0.4%             | 98.9%            | 98.8%            | 99.4%            |
| 65                                     | 1.1%             | 1.2%             | 0.6%             | 98.5%            | 98.4%            | 99.2%            |
| 70                                     | 1.9%             | 1.7%             | 0.8%             | 97.7%            | 97.8%            | 99.0%            |
| 75                                     | 3.4%             | 2.5%             | 1.2%             | 96.2%            | 97.0%            | 98.6%            |

<sup>a</sup> Transition probability for  $E = 0$ , primary education.

<sup>b</sup> Transition probability for  $E = 1$ , secondary education.

<sup>c</sup> Transition probability for  $E = 2$ , higher education.

\*  $p < 0.05$  of difference of adjacent education levels.

Table C.7: (continued)

|                                        | (0) <sup>a</sup> | (1) <sup>b</sup> | (2) <sup>c</sup> | (0) <sup>a</sup> | (1) <sup>b</sup> | (2) <sup>c</sup> |
|----------------------------------------|------------------|------------------|------------------|------------------|------------------|------------------|
| diagnosis: <i>respiratory diseases</i> |                  |                  |                  |                  |                  |                  |
| age                                    |                  | $P_{ID}(t)$      |                  |                  | $P_{IH}(t)$      |                  |
| 55                                     | 2.7%             | 1.2%             | 0.4%             | 96.2%            | 98.3%            | 99.6%            |
| 60                                     | 4.0%             | 1.5%             | 0.5%             | 94.9%            | 98.1%            | 99.4%            |
| 65                                     | 6.4%             | 1.8%*            | 0.7%             | 92.5%            | 97.8%            | 99.2%            |
| 70                                     | 10.7%            | 2.3%*            | 1.0%             | 88.2%            | 97.3%*           | 98.9%            |
| 75                                     | 18.2%            | 3.0%*            | 1.6%             | 80.8%            | 96.5%*           | 98.4%            |
| age                                    |                  | $P_{HD}(t)$      |                  |                  | $P_{HH}(t)$      |                  |
| 55                                     | 2.0%             | 0.6%             | 0.2%             | 96.9%            | 99.0%            | 99.7%            |
| 60                                     | 3.3%             | 0.8%             | 0.3%             | 95.6%            | 98.8%            | 99.6%            |
| 65                                     | 5.8%             | 1.1%*            | 0.5%             | 93.1%            | 98.4%            | 99.4%            |
| 70                                     | 10.3%            | 1.6%*            | 0.9%             | 88.7%            | 97.9%*           | 99.0%            |
| 75                                     | 18.0%            | 2.4%*            | 1.4%             | 81.0%            | 97.1%*           | 98.5%            |
| diagnosis: <i>digestive diseases</i>   |                  |                  |                  |                  |                  |                  |
| age                                    |                  | $P_{ID}(t)$      |                  |                  | $P_{IH}(t)$      |                  |
| 55                                     | 0.9%             | 0.8%             | 0.3%             | 98.9%            | 99.0%            | 99.6%            |
| 60                                     | 1.1%             | 1.0%             | 0.3%             | 98.6%            | 98.8%            | 99.6%            |
| 65                                     | 1.5%             | 1.2%             | 0.4%             | 98.2%            | 98.6%            | 99.5%            |
| 70                                     | 2.3%             | 1.5%             | 0.5%*            | 97.4%            | 98.3%            | 99.4%            |
| 75                                     | 3.8%             | 2.0%             | 0.7%*            | 95.9%            | 97.8%            | 99.2%*           |
| age                                    |                  | $P_{HD}(t)$      |                  |                  | $P_{HH}(t)$      |                  |
| 55                                     | 0.4%             | 0.3%             | 0.1%             | 99.3%            | 99.5%            | 99.8%            |
| 60                                     | 0.6%             | 0.5%             | 0.1%             | 99.1%            | 99.3%            | 99.8%            |
| 65                                     | 1.1%             | 0.7%             | 0.2%             | 98.6%            | 99.1%            | 99.7%            |
| 70                                     | 1.9%             | 1.1%             | 0.3%             | 97.8%            | 98.7%            | 99.6%            |
| 75                                     | 3.4%             | 1.6%             | 0.5%*            | 96.3%            | 98.2%            | 99.4%            |

<sup>a</sup> Transition probability for  $E = 0$ , primary education.

<sup>b</sup> Transition probability for  $E = 1$ , secondary education.

<sup>c</sup> Transition probability for  $E = 2$ , higher education.

\*  $p < 0.05$  of difference of adjacent education levels.

Table C.8: Transition probability within one year by education and diagnosis, model with 3 education levels (structural model)

|                                        | (0) <sup>a</sup> | (1) <sup>b</sup> | (2) <sup>c</sup> | (0) <sup>a</sup> | (1) <sup>b</sup> | (2) <sup>c</sup> |
|----------------------------------------|------------------|------------------|------------------|------------------|------------------|------------------|
| reference individual                   |                  |                  |                  |                  |                  |                  |
| age                                    |                  | $P_{ID}(t)$      |                  |                  | $P_{IH}(t)$      |                  |
| 55                                     | 0.3%             | 0.1%             | 0.4%             | 99.7%            | 99.9%            | 99.5%            |
| 60                                     | 0.3%             | 0.1%             | 0.5%             | 99.6%            | 99.8%            | 99.5%            |
| 65                                     | 0.5%             | 0.2%             | 0.6%             | 99.4%            | 99.7%            | 99.4%            |
| 70                                     | 1.0%             | 0.3%*            | 0.9%             | 99.0%            | 99.6%            | 99.1%            |
| 75                                     | 1.9%             | 0.6%*            | 1.4%             | 98.1%            | 99.3%*           | 98.6%            |
| age                                    |                  | $P_{HD}(t)$      |                  |                  | $P_{HH}(t)$      |                  |
| 55                                     | 0.1%             | 0.1%             | 0.1%             | 99.9%            | 99.9%            | 99.9%            |
| 60                                     | 0.2%             | 0.1%             | 0.1%             | 99.8%            | 99.8%            | 99.8%            |
| 65                                     | 0.4%             | 0.2%             | 0.3%             | 99.6%            | 99.8%            | 99.7%            |
| 70                                     | 0.8%             | 0.3%*            | 0.5%             | 99.2%            | 99.6%            | 99.4%            |
| 75                                     | 1.8%             | 0.6%*            | 1.0%             | 98.2%            | 99.3%*           | 98.9%            |
| diagnosis: <i>neoplasm</i>             |                  |                  |                  |                  |                  |                  |
| age                                    |                  | $P_{ID}(t)$      |                  |                  | $P_{IH}(t)$      |                  |
| 55                                     | 5.6%             | 4.2%             | 5.8%             | 94.1%            | 95.4%            | 93.8%            |
| 60                                     | 6.3%             | 4.6%             | 6.7%*            | 93.4%            | 95.0%            | 92.9%            |
| 65                                     | 8.0%             | 5.4%             | 8.5%*            | 91.7%            | 94.2%            | 91.1%*           |
| 70                                     | 11.6%            | 6.9%*            | 12.1%*           | 88.1%            | 92.7%            | 87.6%*           |
| 75                                     | 19.1%            | 9.6%*            | 18.9%*           | 80.6%            | 90.1%            | 80.8%*           |
| age                                    |                  | $P_{HD}(t)$      |                  |                  | $P_{HH}(t)$      |                  |
| 55                                     | 1.4%             | 1.3%             | 1.7%             | 98.3%            | 98.3%            | 97.9%            |
| 60                                     | 2.2%             | 1.7%             | 2.7%             | 97.5%            | 97.9%            | 96.9%            |
| 65                                     | 4.0%             | 2.5%             | 4.6%             | 95.7%            | 97.0%            | 95.0%            |
| 70                                     | 7.8%             | 4.1%             | 8.4%*            | 91.9%            | 95.5%            | 91.2%*           |
| 75                                     | 15.8%            | 6.9%*            | 15.6%*           | 84.0%            | 92.7%*           | 84.0%*           |
| diagnosis: <i>circulatory diseases</i> |                  |                  |                  |                  |                  |                  |
| age                                    |                  | $P_{ID}(t)$      |                  |                  | $P_{IH}(t)$      |                  |
| 55                                     | 1.3%             | 0.3%             | 2.2%*            | 98.6%            | 99.5%            | 97.7%*           |
| 60                                     | 1.4%             | 0.4%             | 2.4%*            | 98.5%            | 99.3%            | 97.5%*           |
| 65                                     | 1.7%             | 0.7%             | 2.8%*            | 98.2%            | 99.1%            | 97.0%*           |
| 70                                     | 2.3%             | 1.1%             | 3.7%*            | 97.5%            | 98.6%            | 96.1%*           |
| 75                                     | 3.8%             | 2.0%             | 5.5%*            | 96.1%            | 97.7%            | 94.3%*           |
| age                                    |                  | $P_{HD}(t)$      |                  |                  | $P_{HH}(t)$      |                  |
| 55                                     | 0.2%             | 0.2%             | 0.4%             | 99.7%            | 99.5%            | 99.4%            |
| 60                                     | 0.3%             | 0.3%             | 0.7%             | 99.5%            | 99.4%            | 99.2%            |
| 65                                     | 0.6%             | 0.6%             | 1.1%             | 99.2%            | 99.1%            | 98.7%            |
| 70                                     | 1.3%             | 1.1%             | 2.0%             | 98.6%            | 98.6%            | 97.8%            |
| 75                                     | 2.7%             | 2.0%             | 3.9%             | 97.1%            | 97.7%            | 95.9%            |

<sup>a</sup> Transition probability for  $E = 0$ , primary education.

<sup>b</sup> Transition probability for  $E = 1$ , secondary education.

<sup>c</sup> Transition probability for  $E = 2$ , higher education.

\* $p < 0.05$  of difference of adjacent education levels.

Table C.8: (continued)

|                                        | (0) <sup>a</sup> | (1) <sup>b</sup> | (2) <sup>c</sup> | (0) <sup>a</sup> | (1) <sup>b</sup> | (2) <sup>c</sup> |
|----------------------------------------|------------------|------------------|------------------|------------------|------------------|------------------|
| diagnosis: <i>respiratory diseases</i> |                  |                  |                  |                  |                  |                  |
| age                                    |                  | $P_{ID}(t)$      |                  |                  | $P_{IH}(t)$      |                  |
| 55                                     | 1.5%             | 1.1%             | 0.4%             | 98.3%            | 98.7%            | 99.5%            |
| 60                                     | 2.1%             | 1.1%             | 0.5%             | 97.7%            | 98.6%            | 99.4%            |
| 65                                     | 3.5%             | 1.4%*            | 0.7%             | 96.3%            | 98.4%            | 99.2%            |
| 70                                     | 6.4%             | 1.7%*            | 1.1%             | 93.4%            | 98.1%*           | 98.8%            |
| 75                                     | 12.6%            | 2.2%*            | 1.9%             | 87.2%            | 97.6%*           | 98.0%            |
| age                                    |                  | $P_{HD}(t)$      |                  |                  | $P_{HH}(t)$      |                  |
| 55                                     | 0.6%             | 0.2%             | 0.1%             | 99.2%            | 99.6%            | 99.8%            |
| 60                                     | 1.2%             | 0.3%             | 0.2%             | 98.6%            | 99.5%            | 99.7%            |
| 65                                     | 2.6%             | 0.5%*            | 0.4%             | 97.2%            | 99.3%            | 99.5%            |
| 70                                     | 5.6%             | 0.8%*            | 0.8%             | 94.2%            | 99.0%*           | 99.1%            |
| 75                                     | 12.0%            | 1.4%*            | 1.6%             | 87.8%            | 98.5%*           | 98.3%            |
| diagnosis: <i>digestive diseases</i>   |                  |                  |                  |                  |                  |                  |
| age                                    |                  | $P_{ID}(t)$      |                  |                  | $P_{IH}(t)$      |                  |
| 55                                     | 0.8%             | 0.5%             | 0.4%             | 99.1%            | 99.4%            | 99.5%            |
| 60                                     | 0.9%             | 0.6%             | 0.4%             | 99.0%            | 99.3%            | 99.5%            |
| 65                                     | 1.2%             | 0.8%             | 0.6%             | 98.6%            | 99.1%            | 99.4%            |
| 70                                     | 1.9%             | 1.1%             | 0.8%*            | 97.9%            | 98.8%            | 99.1%            |
| 75                                     | 3.5%             | 1.6%             | 1.3%*            | 96.4%            | 98.3%            | 98.6%            |
| age                                    |                  | $P_{HD}(t)$      |                  |                  | $P_{HH}(t)$      |                  |
| 55                                     | 0.2%             | 0.1%             | 0.1%             | 99.7%            | 99.8%            | 99.8%            |
| 60                                     | 0.3%             | 0.2%             | 0.1%             | 99.6%            | 99.7%            | 99.8%            |
| 65                                     | 0.6%             | 0.4%             | 0.3%             | 99.3%            | 99.5%            | 99.7%            |
| 70                                     | 1.4%             | 0.7%             | 0.5%             | 98.5%            | 99.2%            | 99.4%            |
| 75                                     | 2.9%             | 1.3%*            | 1.0%             | 97.0%            | 98.7%            | 98.9%            |

<sup>a</sup> Transition probability for  $E = 0$ , primary education.

<sup>b</sup> Transition probability for  $E = 1$ , secondary education.

<sup>c</sup> Transition probability for  $E = 2$ , higher education.

\*  $p < 0.05$  of difference of adjacent education levels.



Table C.9: Transition probability within one year by education and diagnosis, model with piecewise constant age dependence from hospitalized

|     | $P_{ID}(t)$                                             |                  | $P_{IH}(t)$      |                  | $P_{HD}(t)$      |                  | $P_{HH}(t)$      |                  |
|-----|---------------------------------------------------------|------------------|------------------|------------------|------------------|------------------|------------------|------------------|
|     | (0) <sup>a</sup>                                        | (1) <sup>b</sup> | (0) <sup>a</sup> | (1) <sup>b</sup> | (0) <sup>a</sup> | (1) <sup>b</sup> | (0) <sup>a</sup> | (1) <sup>b</sup> |
| age | Stratified model: reference individual                  |                  |                  |                  |                  |                  |                  |                  |
| 55  | 0.3%                                                    | 0.2%             | 99.5%            | 99.7%            | 0.2%             | 0.1%             | 99.7%            | 99.8%            |
| 60  | 0.5%                                                    | 0.3%             | 99.5%            | 99.7%            | 0.3%             | 0.2%             | 99.7%            | 99.8%            |
| 65  | 0.7%                                                    | 0.4%             | 99.2%            | 99.6%            | 0.5%             | 0.3%             | 99.4%            | 99.7%            |
| 70  | 1.1%                                                    | 0.5%*            | 98.8%            | 99.4%            | 1.0%             | 0.4%*            | 98.9%            | 99.5%            |
| 75  | 2.0%                                                    | 0.7%*            | 97.9%            | 99.2%*           | 1.9%             | 0.6%*            | 98.1%            | 99.3%*           |
| age | Structural model: reference individual                  |                  |                  |                  |                  |                  |                  |                  |
| 55  | 0.2%                                                    | 0.2%             | 99.7%            | 99.8%            | 0.1%             | 0.1%             | 99.9%            | 99.9%            |
| 60  | 0.3%                                                    | 0.2%             | 99.6%            | 99.7%            | 0.2%             | 0.1%             | 99.8%            | 99.8%            |
| 65  | 0.5%                                                    | 0.4%             | 99.4%            | 99.6%            | 0.4%             | 0.2%             | 99.6%            | 99.7%            |
| 70  | 1.0%                                                    | 0.6%             | 99.0%            | 99.3%            | 0.8%             | 0.5%             | 99.1%            | 99.4%            |
| 75  | 1.9%                                                    | 1.0%             | 98.0%            | 98.9%            | 1.8%             | 0.9%             | 98.2%            | 99.0%            |
| age | Structural model diagnosis: <i>neoplasm</i>             |                  |                  |                  |                  |                  |                  |                  |
| 55  | 6.1%                                                    | 5.9%             | 93.5%            | 93.7%            | 1.7%             | 1.7%             | 97.8%            | 97.8%            |
| 60  | 6.5%                                                    | 6.3%             | 93.3%            | 93.3%            | 2.1%             | 2.2%             | 97.6%            | 97.4%            |
| 65  | 8.4%                                                    | 7.7%             | 91.3%            | 91.8%            | 4.2%             | 3.6%             | 95.5%            | 95.8%            |
| 70  | 12.0%                                                   | 9.8%             | 87.7%            | 89.7%            | 8.0%             | 5.9%             | 91.7%            | 93.6%            |
| 75  | 19.5%                                                   | 13.8%            | 80.2%            | 85.7%            | 16.0%            | 10.0%            | 83.7%            | 89.4%            |
| age | Structural model diagnosis: <i>circulatory diseases</i> |                  |                  |                  |                  |                  |                  |                  |
| 55  | 1.3%                                                    | 0.7%             | 98.5%            | 99.0%            | 0.2%             | 0.2%             | 99.6%            | 99.5%            |
| 60  | 1.4%                                                    | 0.8%             | 98.5%            | 98.9%            | 0.3%             | 0.4%             | 99.6%            | 99.4%            |
| 65  | 1.7%                                                    | 1.2%             | 98.1%            | 98.5%            | 0.7%             | 0.8%             | 99.2%            | 98.9%            |
| 70  | 2.4%                                                    | 1.8%             | 97.5%            | 97.9%            | 1.3%             | 1.4%             | 98.5%            | 98.3%            |
| 75  | 3.8%                                                    | 3.0%             | 96.0%            | 96.7%            | 2.8%             | 2.6%             | 97.1%            | 97.0%            |
| age | Structural model diagnosis: <i>respiratory diseases</i> |                  |                  |                  |                  |                  |                  |                  |
| 55  | 1.6%                                                    | 1.1%             | 98.1%            | 98.8%            | 0.6%             | 0.2%             | 99.1%            | 99.7%            |
| 60  | 2.2%                                                    | 1.2%             | 97.7%            | 98.7%            | 1.2%             | 0.3%             | 98.6%            | 99.6%            |
| 65  | 3.5%                                                    | 1.4%*            | 96.2%            | 98.4%            | 2.6%             | 0.5%             | 97.1%            | 99.3%            |
| 70  | 6.5%                                                    | 1.8%*            | 93.3%            | 98.1%*           | 5.7%             | 0.9%*            | 94.1%            | 98.9%*           |
| 75  | 12.7%                                                   | 2.5%*            | 87.1%            | 97.3%*           | 12.1%            | 1.7%*            | 87.7%            | 98.1%*           |
| age | Structural model diagnosis: <i>digestive diseases</i>   |                  |                  |                  |                  |                  |                  |                  |
| 55  | 0.8%                                                    | 0.7%             | 99.0%            | 99.2%            | 0.2%             | 0.1%             | 99.7%            | 99.8%            |
| 60  | 0.9%                                                    | 0.8%             | 99.0%            | 99.1%            | 0.3%             | 0.2%             | 99.6%            | 99.7%            |
| 65  | 1.3%                                                    | 1.0%             | 98.6%            | 98.9%            | 0.6%             | 0.3%             | 99.2%            | 99.5%            |
| 70  | 2.0%                                                    | 1.2%             | 97.9%            | 98.7%            | 1.4%             | 0.6%             | 98.5%            | 99.3%            |
| 75  | 3.5%                                                    | 1.8%             | 96.4%            | 98.1%            | 2.9%             | 1.2%             | 97.0%            | 98.7%            |

<sup>a</sup> Transition probability for  $E = 0$ , primary education.

<sup>b</sup> Transition probability for  $E = 1$ , above primary education.

\* $p < 0.05$  of difference.

Table C.10: Transition probability within one year by education and diagnosis, model with two IQ-tests

|     | $P_{ID}(t)$                                             |                  | $P_{IH}(t)$      |                  | $P_{HD}(t)$      |                  | $P_{HH}(t)$      |                  |
|-----|---------------------------------------------------------|------------------|------------------|------------------|------------------|------------------|------------------|------------------|
|     | (0) <sup>a</sup>                                        | (1) <sup>b</sup> | (0) <sup>a</sup> | (1) <sup>b</sup> | (0) <sup>a</sup> | (1) <sup>b</sup> | (0) <sup>a</sup> | (1) <sup>b</sup> |
| age | Structural model: reference individual                  |                  |                  |                  |                  |                  |                  |                  |
| 55  | 0.2%                                                    | 0.2%             | 99.7%            | 99.8%            | 0.1%             | 0.1%             | 99.9%            | 99.9%            |
| 60  | 0.3%                                                    | 0.2%             | 99.6%            | 99.7%            | 0.2%             | 0.1%             | 99.8%            | 99.8%            |
| 65  | 0.5%                                                    | 0.4%             | 99.5%            | 99.6%            | 0.3%             | 0.2%             | 99.6%            | 99.7%            |
| 70  | 0.9%                                                    | 0.6%             | 99.1%            | 99.4%            | 0.8%             | 0.5%             | 99.2%            | 99.5%            |
| 75  | 1.8%                                                    | 1.0%             | 98.2%            | 98.9%            | 1.6%             | 0.9%             | 98.3%            | 99.0%            |
| age | Structural model diagnosis: <i>neoplasm</i>             |                  |                  |                  |                  |                  |                  |                  |
| 55  | 4.0%                                                    | 5.6%*            | 95.9%            | 93.9%*           | 0.9%             | 1.6%             | 99.0%            | 97.9%            |
| 60  | 4.7%                                                    | 6.1%             | 95.2%            | 93.4%            | 1.7%             | 2.1%             | 98.2%            | 97.4%            |
| 65  | 6.4%                                                    | 7.0%             | 93.5%            | 92.5%            | 3.4%             | 3.0%             | 96.5%            | 96.5%            |
| 70  | 9.9%                                                    | 8.7%             | 90.0%            | 90.9%            | 7.1%             | 4.8%             | 92.8%            | 94.7%            |
| 75  | 17.1%                                                   | 11.9%            | 82.8%            | 87.6%            | 14.6%            | 8.2%*            | 85.3%            | 91.3%            |
| age | Structural model diagnosis: <i>circulatory diseases</i> |                  |                  |                  |                  |                  |                  |                  |
| 55  | 1.0%                                                    | 0.6%             | 99.0%            | 99.1%            | 0.2%             | 0.2%             | 99.8%            | 99.6%            |
| 60  | 1.1%                                                    | 0.8%             | 98.8%            | 99.0%            | 0.3%             | 0.3%             | 99.7%            | 99.4%            |
| 65  | 1.4%                                                    | 1.0%             | 98.5%            | 98.8%            | 0.6%             | 0.6%             | 99.4%            | 99.2%            |
| 70  | 2.1%                                                    | 1.5%             | 97.9%            | 98.3%            | 1.3%             | 1.0%             | 98.7%            | 98.7%            |
| 75  | 3.5%                                                    | 2.4%             | 96.5%            | 97.4%            | 2.7%             | 2.0%             | 97.3%            | 97.8%            |
| age | Structural model diagnosis: <i>respiratory diseases</i> |                  |                  |                  |                  |                  |                  |                  |
| 55  | 1.0%                                                    | 1.0%             | 98.9%            | 98.8%            | 0.6%             | 0.2%             | 99.4%            | 99.7%            |
| 60  | 1.7%                                                    | 1.1%             | 98.3%            | 98.8%            | 1.3%             | 0.2%*            | 98.7%            | 99.6%            |
| 65  | 3.2%                                                    | 1.2%*            | 96.8%            | 98.6%            | 2.8%             | 0.4%*            | 97.2%            | 99.5%*           |
| 70  | 6.3%                                                    | 1.5%*            | 93.7%            | 98.4%*           | 5.9%             | 0.7%*            | 94.0%            | 99.2%*           |
| 75  | 12.8%                                                   | 2.1%*            | 87.2%            | 97.8%*           | 12.6%            | 1.2%*            | 87.4%            | 98.6%*           |
| age | Structural model diagnosis: <i>digestive diseases</i>   |                  |                  |                  |                  |                  |                  |                  |
| 55  | 0.8%                                                    | 0.7%             | 99.2%            | 99.2%            | 0.1%             | 0.1%             | 99.8%            | 99.8%            |
| 60  | 0.9%                                                    | 0.8%             | 99.0%            | 99.1%            | 0.3%             | 0.2%             | 99.7%            | 99.7%            |
| 65  | 1.3%                                                    | 0.9%             | 98.7%            | 99.0%            | 0.6%             | 0.3%             | 99.3%            | 99.6%            |
| 70  | 1.9%                                                    | 1.1%             | 98.0%            | 98.8%            | 1.3%             | 0.5%             | 98.7%            | 99.4%            |
| 75  | 3.4%                                                    | 1.5%*            | 96.5%            | 98.4%            | 2.8%             | 0.9%*            | 97.1%            | 99.0%*           |

<sup>a</sup> Transition probability for  $E = 0$ , primary education.

<sup>b</sup> Transition probability for  $E = 1$ , above primary education.

\* $p < 0.05$  of difference.

Table C.11: Transition probability within one year by education and diagnosis, model with teacher advice

|     | $P_{ID}(t)$                                             |                  | $P_{IH}(t)$      |                  | $P_{HD}(t)$      |                  | $P_{HH}(t)$      |                  |
|-----|---------------------------------------------------------|------------------|------------------|------------------|------------------|------------------|------------------|------------------|
|     | (0) <sup>a</sup>                                        | (1) <sup>b</sup> | (0) <sup>a</sup> | (1) <sup>b</sup> | (0) <sup>a</sup> | (1) <sup>b</sup> | (0) <sup>a</sup> | (1) <sup>b</sup> |
| age | Stratified model: reference individual                  |                  |                  |                  |                  |                  |                  |                  |
| 55  | 0.3%                                                    | 0.2%             | 99.6%            | 99.7%            | 0.2%             | 0.1%             | 99.8%            | 99.8%            |
| 60  | 0.4%                                                    | 0.3%             | 99.5%            | 99.7%            | 0.3%             | 0.2%             | 99.6%            | 99.8%            |
| 65  | 0.7%                                                    | 0.3%             | 99.3%            | 99.6%            | 0.5%             | 0.3%             | 99.4%            | 99.7%            |
| 70  | 1.1%                                                    | 0.5%*            | 98.8%            | 99.5%            | 1.0%             | 0.4%*            | 99.0%            | 99.5%*           |
| 75  | 1.9%                                                    | 0.7%*            | 98.0%            | 99.3%*           | 1.8%             | 0.6%*            | 98.1%            | 99.3%*           |
| age | Structural model: reference individual                  |                  |                  |                  |                  |                  |                  |                  |
| 55  | 0.2%                                                    | 0.2%             | 99.7%            | 99.8%            | 0.0%             | 0.0%             | 99.9%            | 99.9%            |
| 60  | 0.3%                                                    | 0.2%             | 99.6%            | 99.7%            | 0.2%             | 0.1%             | 99.8%            | 99.8%            |
| 65  | 0.5%                                                    | 0.3%             | 99.5%            | 99.6%            | 0.3%             | 0.2%             | 99.6%            | 99.7%            |
| 70  | 0.9%                                                    | 0.6%             | 99.1%            | 99.4%            | 0.7%             | 0.5%             | 99.2%            | 99.5%            |
| 75  | 1.8%                                                    | 1.0%             | 98.2%            | 98.9%            | 1.6%             | 0.9%             | 98.3%            | 99.0%            |
| age | Structural model diagnosis: <i>neoplasm</i>             |                  |                  |                  |                  |                  |                  |                  |
| 55  | 4.9%                                                    | 5.1%             | 94.9%            | 94.5%            | 1.1%             | 1.5%             | 98.5%            | 98.0%            |
| 60  | 5.6%                                                    | 5.6%             | 94.2%            | 94.0%            | 1.9%             | 2.1%             | 97.8%            | 97.5%            |
| 65  | 7.0%                                                    | 6.6%             | 92.7%            | 92.9%            | 3.5%             | 3.2%             | 96.3%            | 96.4%            |
| 70  | 10.3%                                                   | 8.7%             | 89.5%            | 90.9%            | 6.9%             | 5.3%             | 92.8%            | 94.2%            |
| 75  | 17.2%                                                   | 12.7%            | 82.6%            | 86.9%            | 14.2%            | 9.5%             | 85.6%            | 90.0%            |
| age | Structural model diagnosis: <i>circulatory diseases</i> |                  |                  |                  |                  |                  |                  |                  |
| 55  | 1.2%                                                    | 0.6%             | 98.7%            | 99.1%            | 0.2%             | 0.2%             | 99.7%            | 99.5%            |
| 60  | 1.3%                                                    | 0.8%             | 98.6%            | 98.9%            | 0.3%             | 0.4%             | 99.6%            | 99.3%            |
| 65  | 1.6%                                                    | 1.1%             | 98.3%            | 98.6%            | 0.6%             | 0.7%             | 99.3%            | 99.0%            |
| 70  | 2.2%                                                    | 1.7%             | 97.7%            | 98.0%            | 1.2%             | 1.3%             | 98.7%            | 98.4%            |
| 75  | 3.5%                                                    | 3.0%             | 96.4%            | 96.8%            | 2.5%             | 2.6%             | 97.4%            | 97.1%            |
| age | Structural model diagnosis: <i>respiratory diseases</i> |                  |                  |                  |                  |                  |                  |                  |
| 55  | 1.4%                                                    | 1.0%             | 98.5%            | 98.8%            | 0.6%             | 0.2%             | 99.3%            | 99.6%            |
| 60  | 2.0%                                                    | 1.1%             | 97.9%            | 98.7%            | 1.2%             | 0.4%             | 98.7%            | 99.5%            |
| 65  | 3.3%                                                    | 1.4%*            | 96.6%            | 98.5%            | 2.6%             | 0.6%*            | 97.3%            | 99.2%            |
| 70  | 6.2%                                                    | 1.8%*            | 93.7%            | 98.0%*           | 5.5%             | 1.1%*            | 94.3%            | 98.7%*           |
| 75  | 12.4%                                                   | 2.8%*            | 87.5%            | 97.0%*           | 11.8%            | 2.0%*            | 88.0%            | 97.8%*           |
| age | Structural model diagnosis: <i>digestive diseases</i>   |                  |                  |                  |                  |                  |                  |                  |
| 55  | 0.7%                                                    | 0.6%             | 99.2%            | 99.3%            | 0.1%             | 0.1%             | 99.8%            | 99.8%            |
| 60  | 0.8%                                                    | 0.7%             | 99.1%            | 99.2%            | 0.3%             | 0.2%             | 99.6%            | 99.7%            |
| 65  | 1.1%                                                    | 0.8%             | 98.8%            | 99.1%            | 0.5%             | 0.3%             | 99.4%            | 99.6%            |
| 70  | 1.7%                                                    | 1.1%             | 98.2%            | 98.8%            | 1.1%             | 0.6%             | 98.8%            | 99.3%            |
| 75  | 3.0%                                                    | 1.6%             | 96.9%            | 98.3%            | 2.5%             | 1.1%             | 97.4%            | 98.8%            |

<sup>a</sup> Transition probability for  $E = 0$ , primary education.

<sup>b</sup> Transition probability for  $E = 1$ , above primary education.

\*  $p < 0.05$  of difference.
